# Supplementary material
Source: PubMed Central journal article supplement (PMC6589135)
Supplement: NIHMS1525662-supplement-1.pdf [file NIHMS1525662-supplement-1.pdf]

**Appendix**  
**Association of Fitness with Racial Differences in Chronic Kidney Disease**  
**Paluch et al.**

**Appendix Figure 1.** Flow chart for selection of final analytic sample.

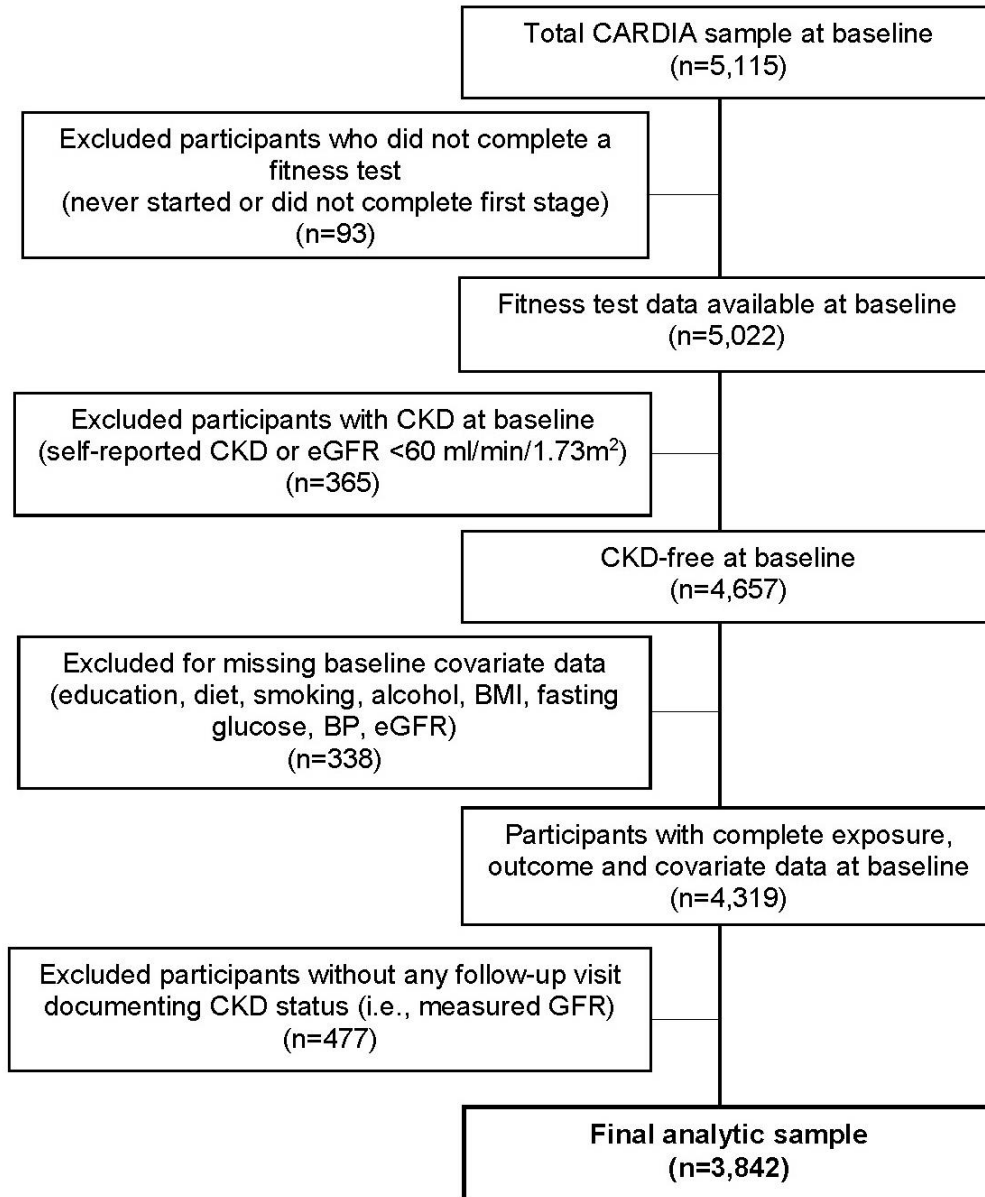

**Appendix**  
**Association of Fitness with Racial Differences in Chronic Kidney Disease**  
**Paluch et al.**

**Appendix Figure 2.** Unadjusted and adjusted mean treadmill duration at baseline visit by race and gender.

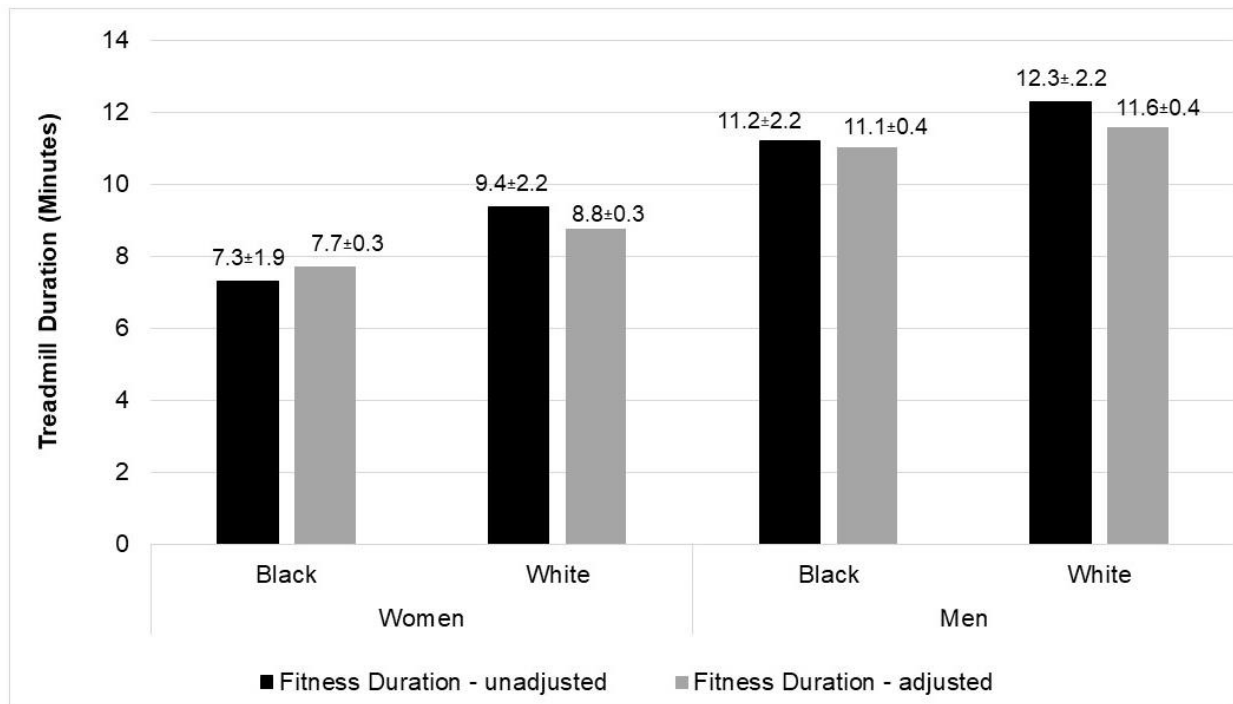

*Notes:*  $p < 0.01$  for difference between race for both men and women in both unadjusted and adjusted models. Unadjusted fitness duration = mean  $\pm$  SD. Adjusted fitness duration = mean  $\pm$  SE. Least squared means adjusted treadmill duration included the following baseline covariates: age, field center, smoking, alcohol intake, diet, eGFR, BMI, Systolic BP, fasting glucose, and maximal education attained throughout study.

**Appendix**  
**Association of Fitness with Racial Differences in Chronic Kidney Disease**  
**Paluch et al.**

**Appendix Table 1.** Association of Fitness with Incident CKD<sup>a,b</sup> in Full Sample and by Fitness Group

| Variable                 | Events / Total         | Association of fitness              | Model 1                     | Model 2                     | Model 3                     | Model 4                     | Model 5                     |
|--------------------------|------------------------|-------------------------------------|-----------------------------|-----------------------------|-----------------------------|-----------------------------|-----------------------------|
|                          |                        |                                     | HR<br>(95% CI)              |
| <b>Duration with CKD</b> |                        |                                     |                             |                             |                             |                             |                             |
| Total                    | 332/2,714 <sup>c</sup> | Fitness per 1-minute lower duration | <b>1.10</b><br>(1.06, 1.15) | <b>1.14</b><br>(1.08, 1.20) | <b>1.13</b><br>(1.07, 1.97) | <b>1.07</b><br>(1.01, 1.14) | <b>1.07</b><br>(1.01, 1.13) |
| <b>Groups with CKD</b>   |                        |                                     |                             |                             |                             |                             |                             |
| Low fitness              | 113/577                | Low vs high (ref)                   | <b>2.57</b><br>(1.95, 3.38) | <b>2.11</b><br>(1.56, 2.86) | <b>2.11</b><br>(1.55, 2.86) | <b>1.61</b><br>(1.16, 2.37) | <b>1.60</b><br>(1.15, 2.23) |
| Moderate fitness         | 120/1,026              | Low vs mod (ref)                    | <b>1.89</b><br>(1.45, 2.46) | <b>1.72</b><br>(1.31, 2.25) | <b>1.72</b><br>(1.31, 2.26) | <b>1.47</b><br>(1.11, 2.00) | <b>1.47</b><br>(1.11, 1.96) |
| High fitness             | 99/1,111               | Mod vs high (ref)                   | <b>1.36</b><br>(1.04, 1.78) | 1.23<br>(0.93, 1.63)        | 1.22<br>(0.92, 1.62)        | 1.10<br>(0.83, 1.47)        | 1.08<br>(0.81, 1.44)        |

*Notes:* Boldface indicates statistical significance ( $p < 0.05$ ). Model 1: Unadjusted. Model 2: Model 1 + gender, race, gender\*race, age, maximal education throughout study, and field center. Model 3: Model 2 + time varying healthy eating index score, smoking status, alcohol intake. Model 4: Model 3 + time varying BMI, systolic BP, fasting glucose. Model 5: Model 4+ Year 10 UACR and baseline eGFR. Low fitness: bottom lowest gender-specific quintile (bottom 20%); Moderate fitness: quintiles 2–3 (middle 20%–60%); High fitness: quintiles 4–5 (top >60%).

<sup>a</sup>Chronic Kidney Disease (CKD) defined as UACR >30mg/g and/or eGFR <60 mL/min/1.73m<sup>2</sup>.

<sup>b</sup>First UACR measured at year 10, so follow-up includes year 15, 20, 25, and 30 exams.

<sup>c</sup>Sample excludes additional participants who did not have UACR measured at year 10, or UACR >30 at year 10, or no follow-up measure of UACR.

eGFR, estimated Glomerular Filtration Rate; HR, hazard ratio; UACR, urinary albumin creatinine ratio.
